# Supplementary material for: Synthesis of an upper- and lower-rim functionalized calix[4]arene for detecting calcium ions using a microcantilever sensor
Source: Royal Society of Chemistry journal article supplement (doi:10.1039/c3nj00223c), 2013-01-01

## Supplementary Information

### Synthesis of an *upper-* and *lower-*rim functionalized calix[4]arene for detecting calcium ions using a microcantilever sensor.

Paris E. Georghiou,<sup>a\*</sup> Shofiur Rahman,<sup>a</sup> Gopikishore Valluru,<sup>a</sup> Louise N. Dawe,<sup>a</sup>

S.M. Saydur Rahman,<sup>b</sup> Abdullah N. Alodhay<sup>b</sup> and L. Y. Beaulieu<sup>b\*</sup>

<sup>a</sup> *Department of Chemistry, Memorial University of Newfoundland, St. John's, Newfoundland and Labrador, Canada A1B3X7.*

*E-mail: [parisg@mun.ca](mailto:parisg@mun.ca).*

<sup>b</sup> *Department of Physics and Physical Oceanography, Memorial University of Newfoundland, St. John's,*

*Newfoundland and Labrador, Canada A1B3X7.*

*E-mail: [lbeaulieu@mun.ca](mailto:lbeaulieu@mun.ca).*

#### Table of Contents

| Description                               | Page Number |
|-------------------------------------------|-------------|
| <sup>1</sup> H- NMR of Compound <b>2</b>  | S2          |
| <sup>13</sup> C- NMR of Compound <b>2</b> | S3          |
| APCI-MS of Compound <b>2</b>              | S4          |
| <sup>1</sup> H- NMR of Compound <b>6</b>  | S5          |
| <sup>13</sup> C- NMR of Compound <b>6</b> | S6          |
| APCI-MS of Compound <b>6</b>              | S7          |
| Checkcif for Compound <b>2</b>            | S8          |

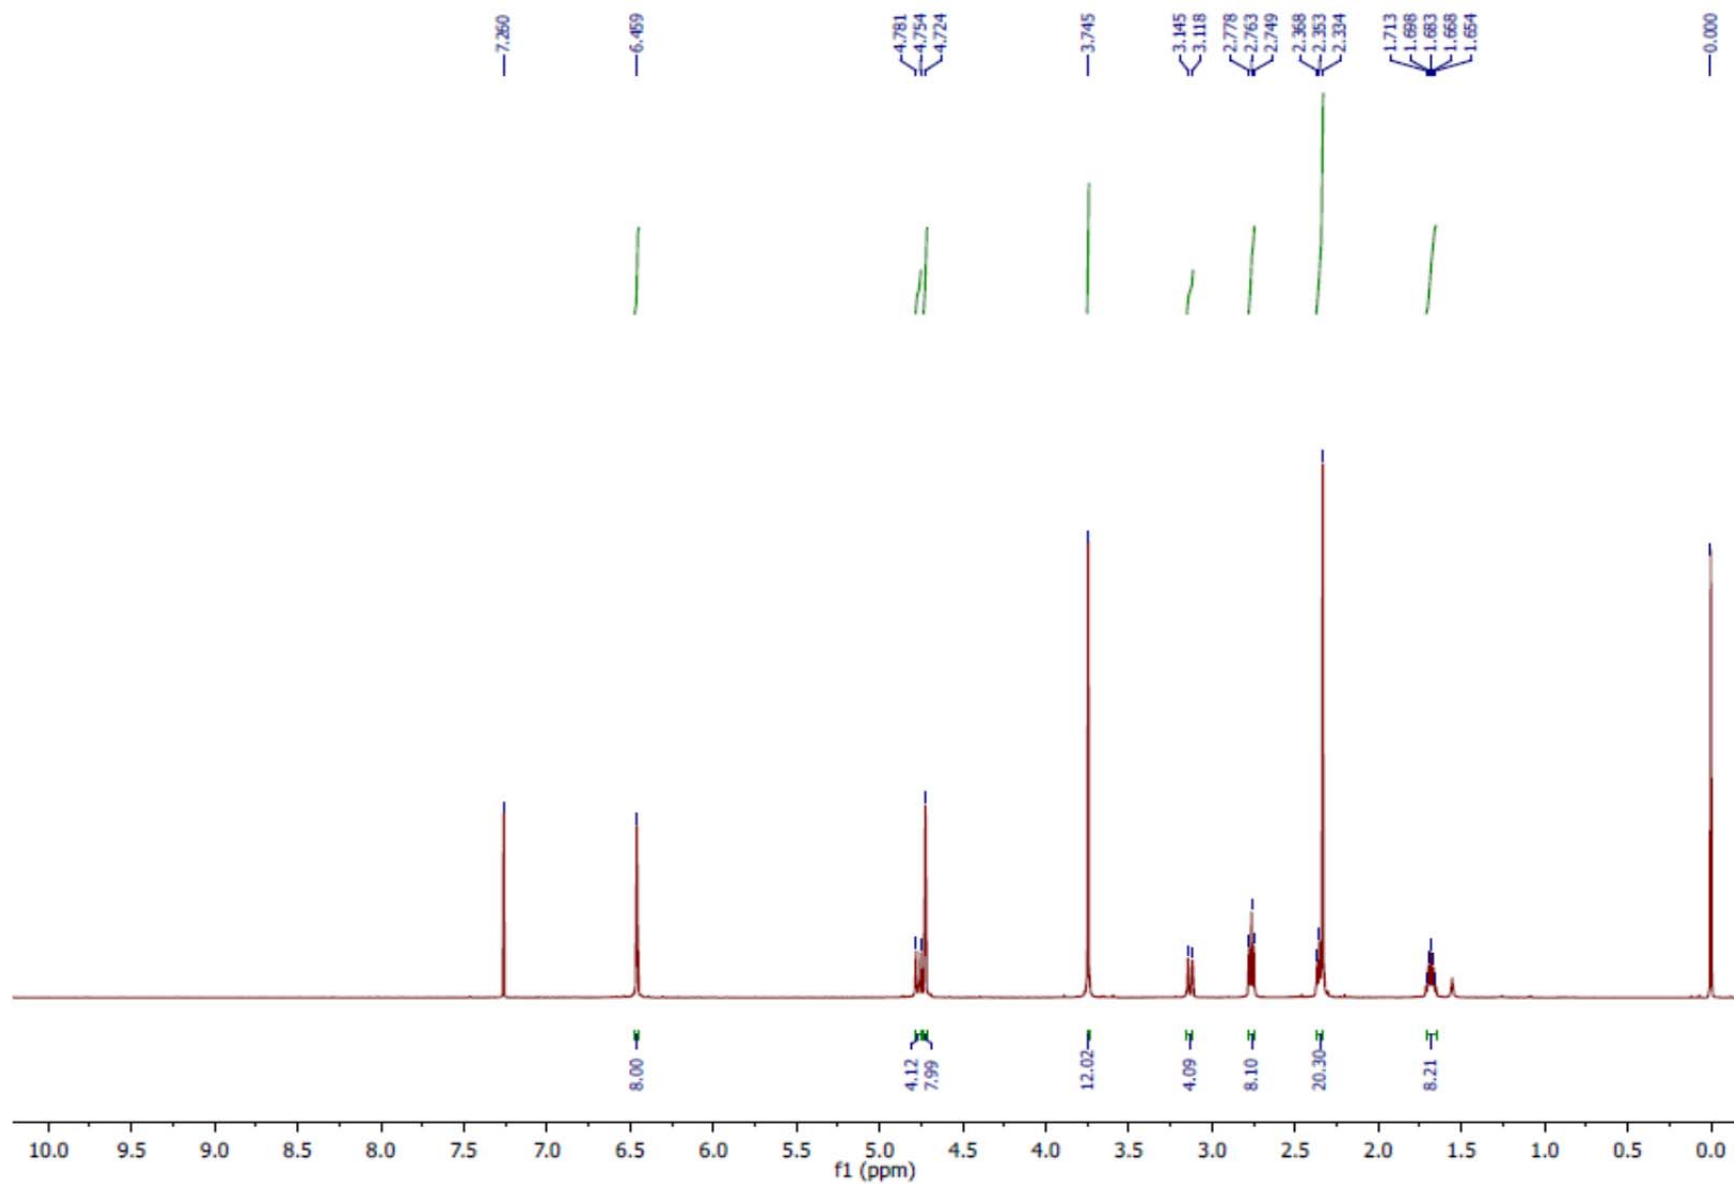

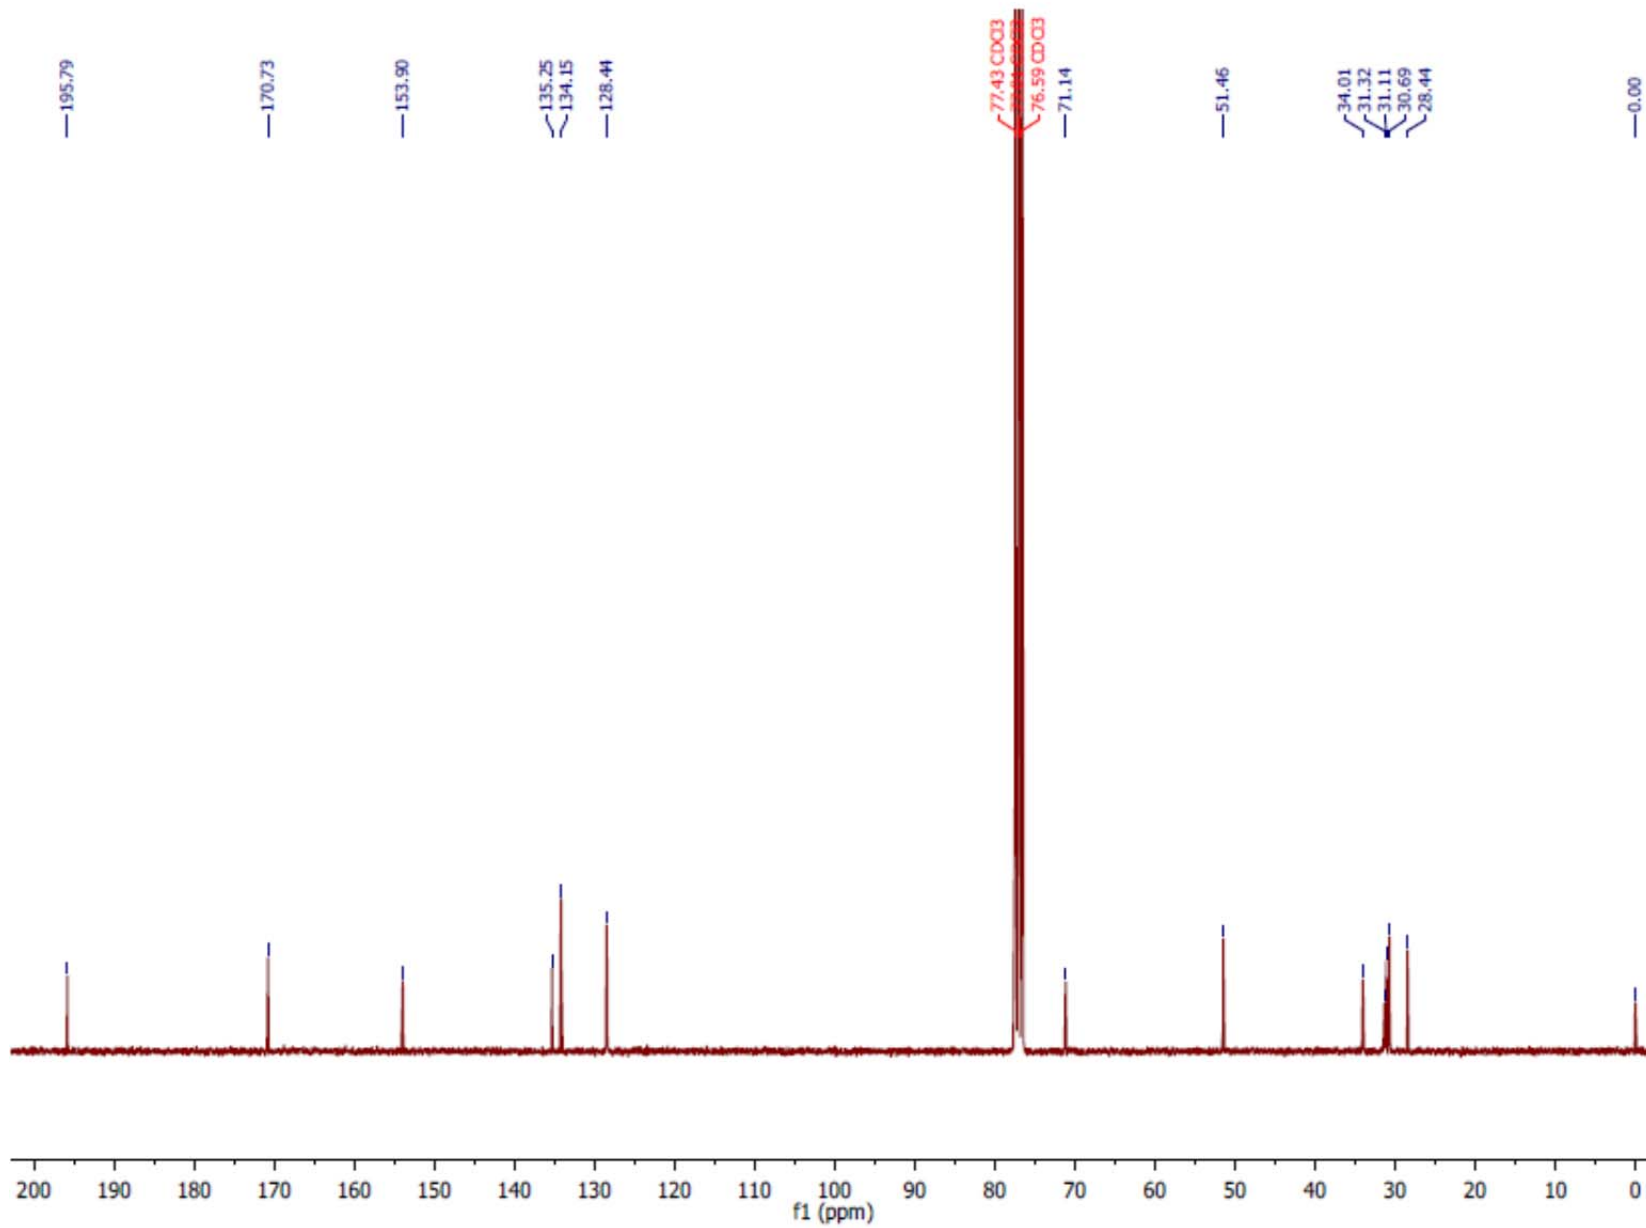

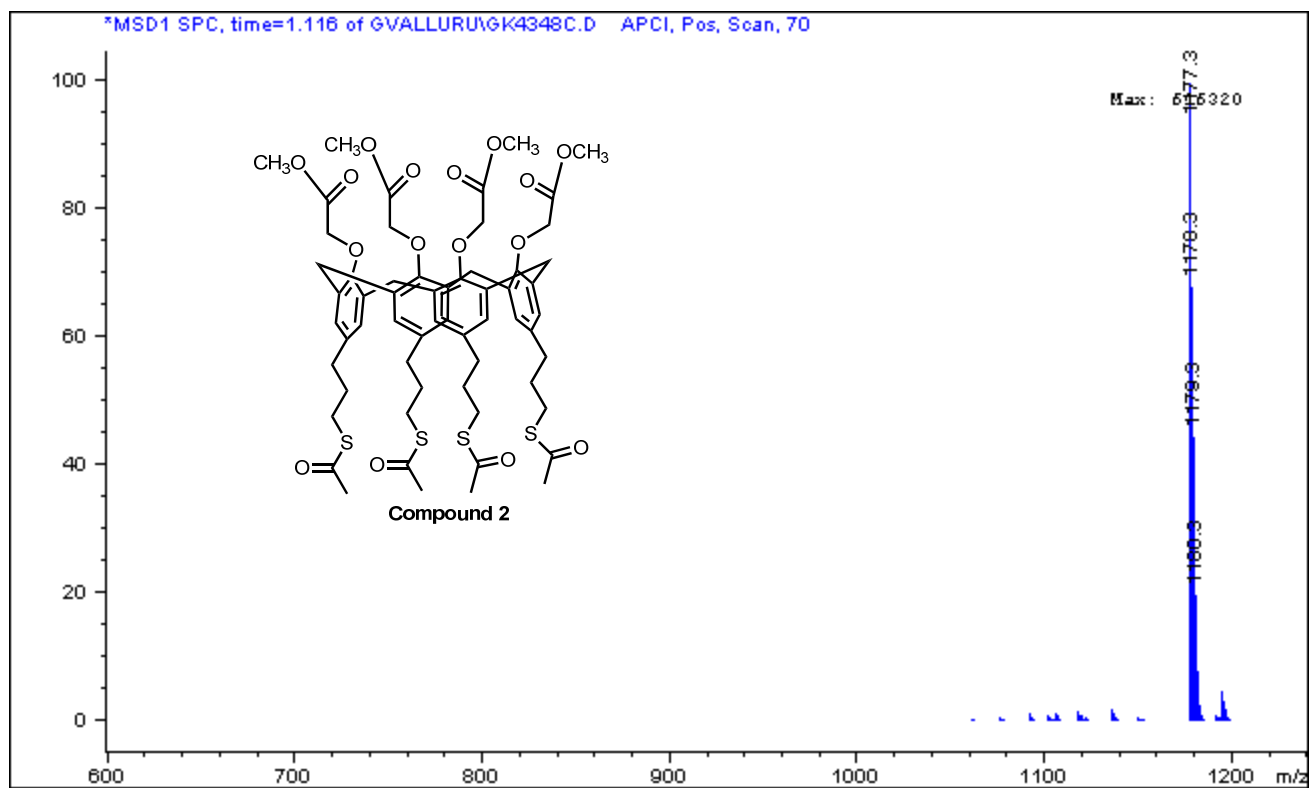

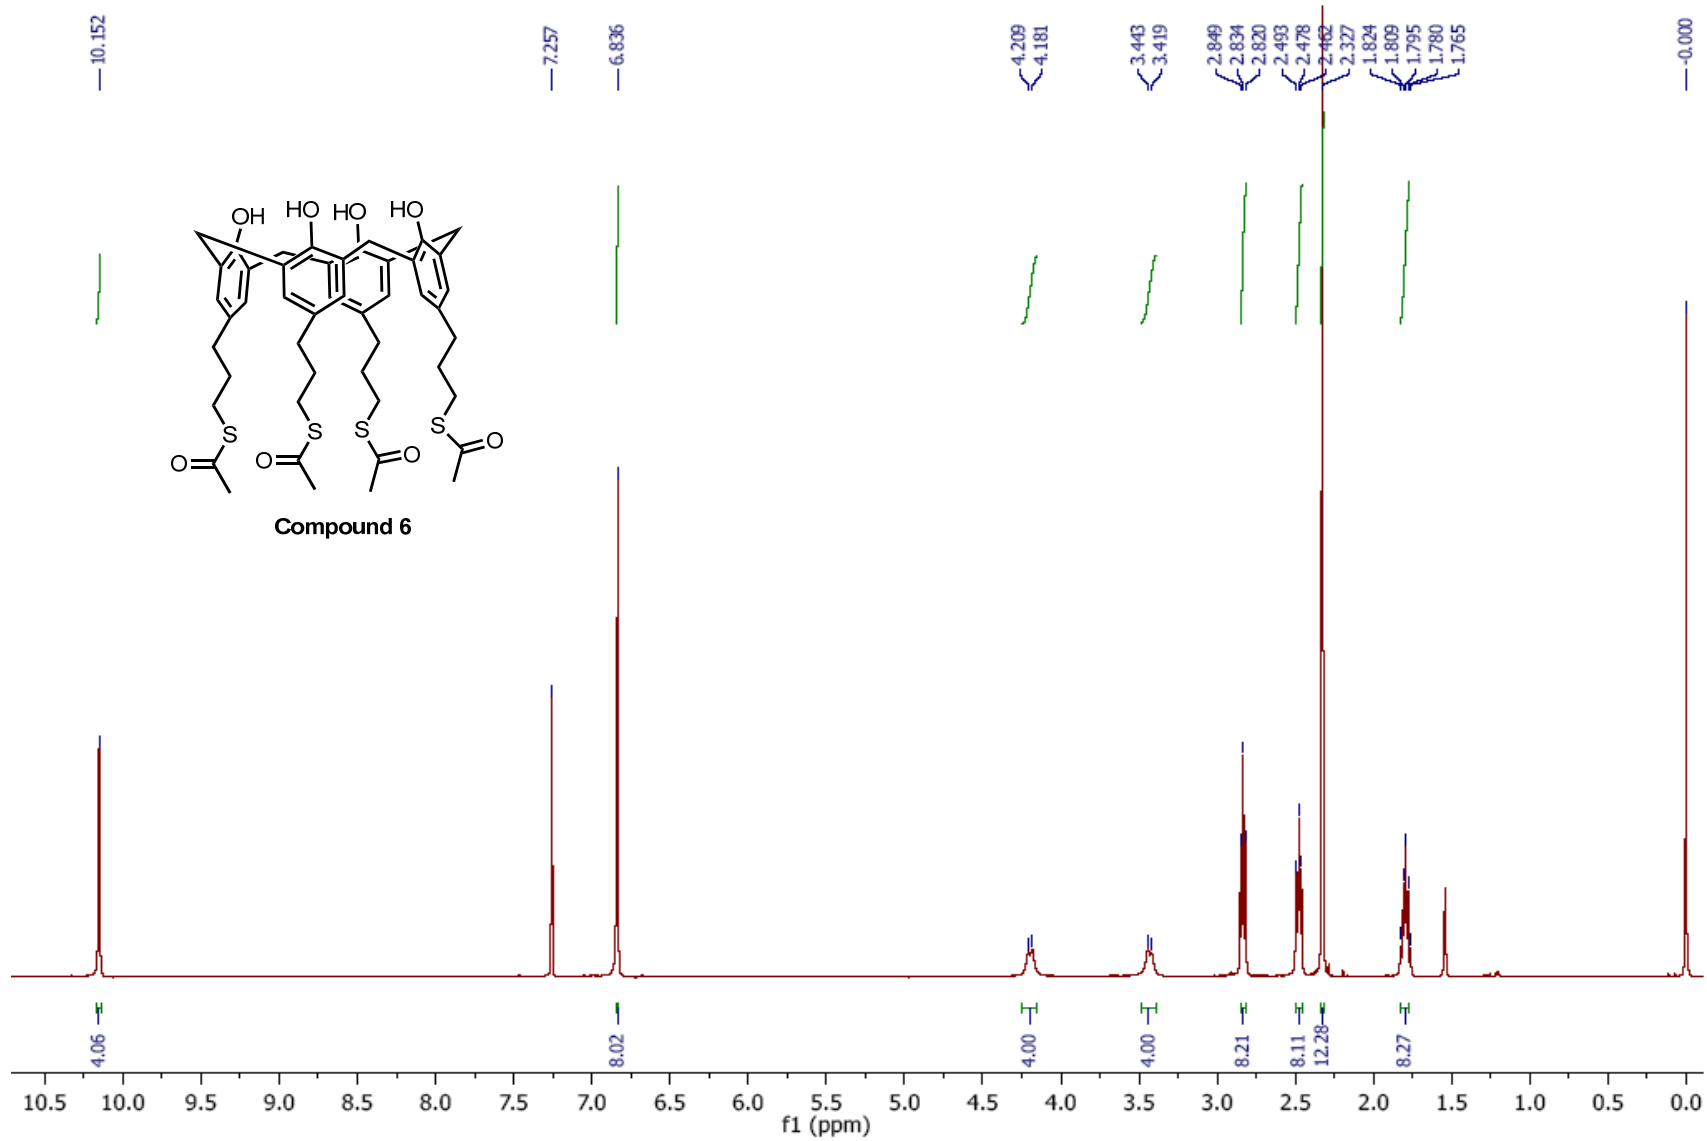

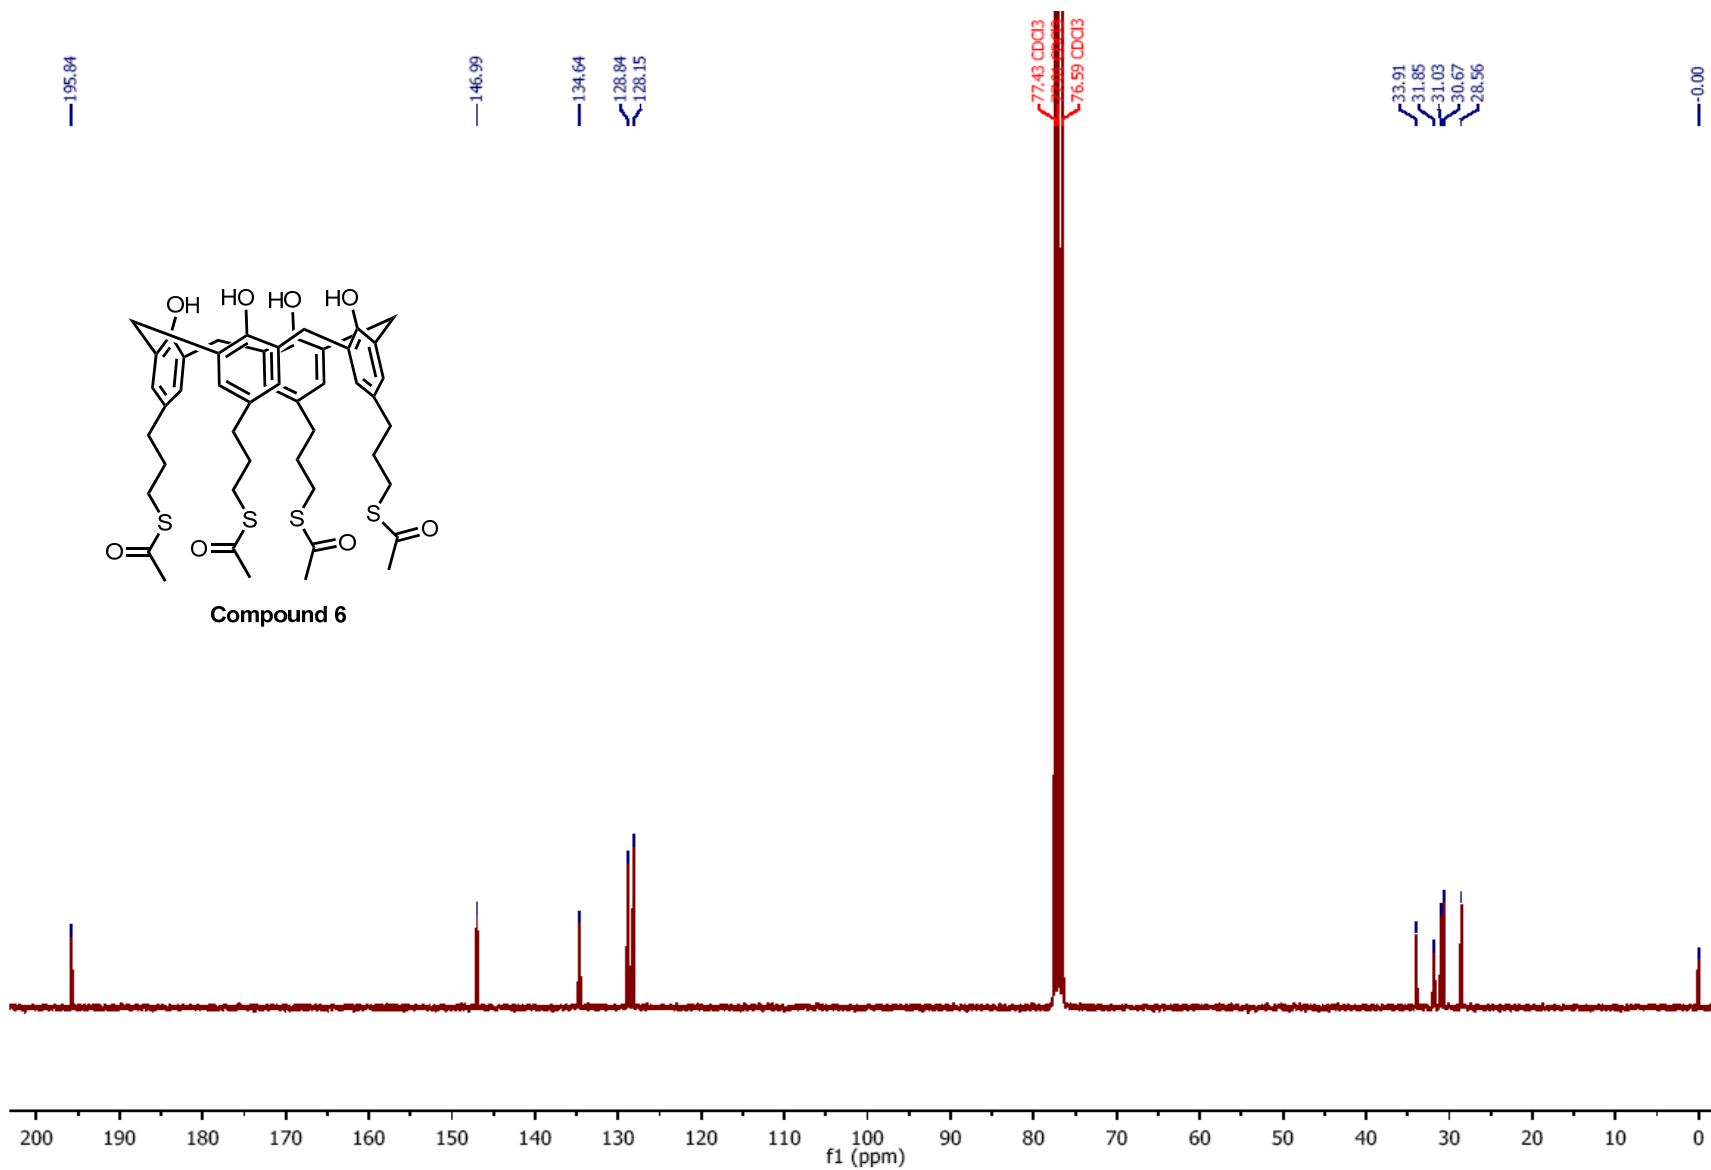

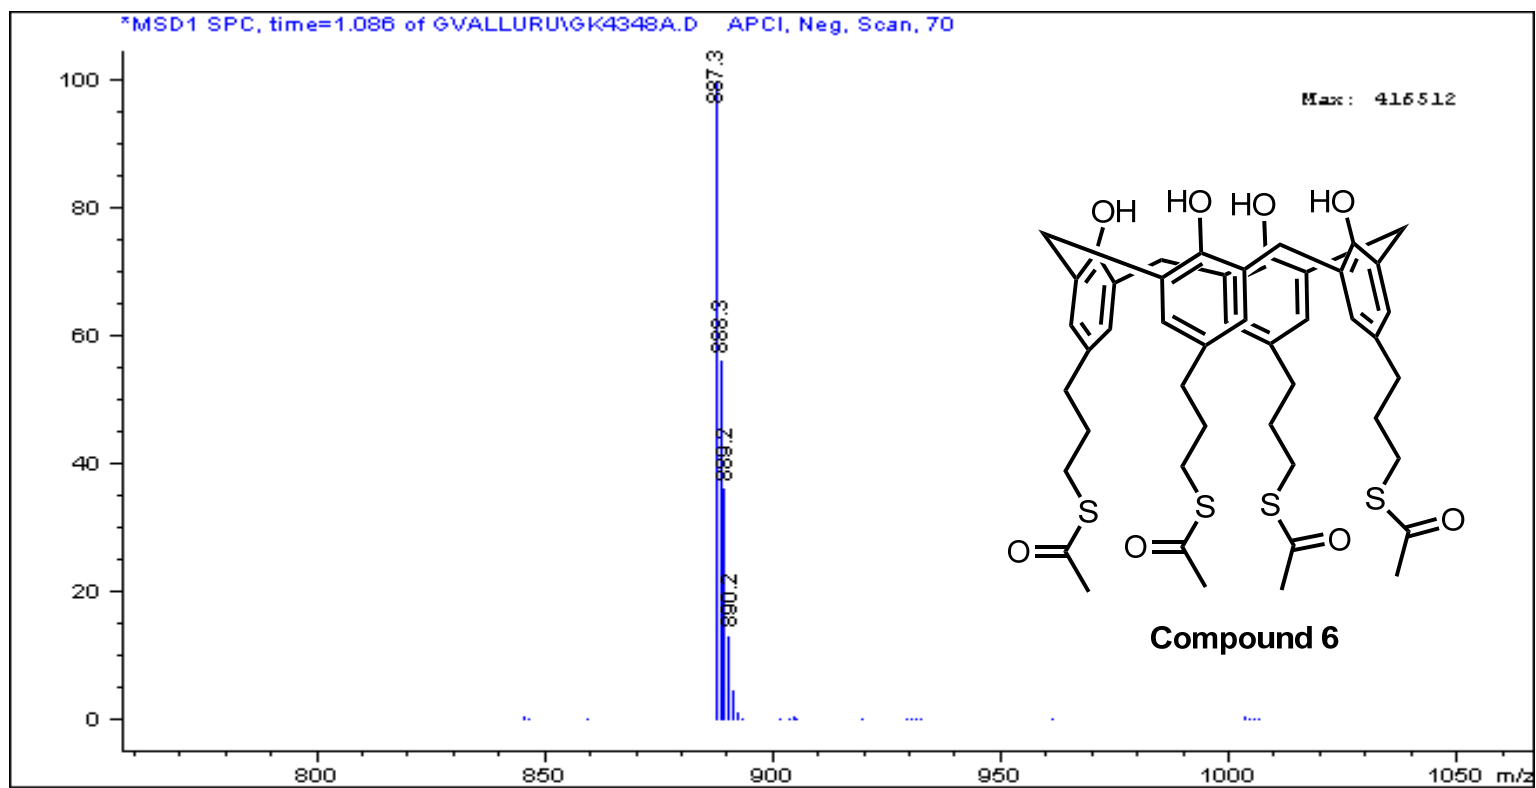

## checkCIF/PLATON report

You have not supplied any structure factors. As a result the full set of tests cannot be run.

No syntax errors found.      CIF dictionary      Interpreting this report

### Datablock: 3

---

Bond precision:    C-C = 0.0058 Å                      Wavelength=0.71075  
Cell:                      a=22.889(7)              b=13.486(4)              c=21.398(6)  
                                    alpha=90                      beta=113.624(4)              gamma=90  
Temperature:              163 K

|                        | Calculated     | Reported       |
|------------------------|----------------|----------------|
| Volume                 | 6052(3)        | 6052(3)        |
| Space group            | C 2/c          | C 1 2/c 1      |
| Hall group             | -C 2yc         | -C 2yc         |
| Moiety formula         | C60 H72 O16 S4 | C60 H72 O16 S4 |
| Sum formula            | C60 H72 O16 S4 | C60 H72 O16 S4 |
| Mr                     | 1177.46        | 1177.46        |
| Dx, g cm <sup>-3</sup> | 1.292          | 1.292          |
| Z                      | 4              | 4              |
| Mu (mm <sup>-1</sup> ) | 0.224          | 0.223          |
| F000                   | 2496.0         | 2496.0         |
| F000'                  | 2499.22        |                |
| h, k, lmax             | 28, 16, 26     | 28, 16, 26     |
| Nref                   | 6285           | 6266           |
| Tmin, Tmax             | 0.961, 0.985   | 0.960, 0.991   |
| Tmin'                  | 0.939          |                |

Correction method= NUMERICAL

Data completeness= 0.997                      Theta(max)= 26.500

R(reflections)= 0.0944( 5422)                      wR2(reflections)= 0.2660( 6266)

S = 1.126                                      Npar= 430

---

The following ALERTS were generated. Each ALERT has the format

**test-name\_ALERT\_alert-type\_alert-level.**

Click on the hyperlinks for more details of the test.

---

#### Alert level C

RFACR01\_ALERT\_3\_C The value of the weighted R factor is > 0.25

Weighted R factor given      0.266

PLAT084\_ALERT\_2\_C High wR2 Value .....      0.27

PLAT220\_ALERT\_2\_C Large Non-Solvent      C      Ueq(max)/Ueq(min) ...      3.1 Ratio



|                   |                                |           |                              |     |        |      |      |
|-------------------|--------------------------------|-----------|------------------------------|-----|--------|------|------|
| PLAT234_ALERT_4_C | Large Hirshfeld Difference O5A | --        | C17A                         | ..  | 0.18   | Ang. |      |
| PLAT242_ALERT_2_C | Check Low                      | Ueq       | as Compared to Neighbors for |     |        | C14  |      |
| PLAT340_ALERT_3_C | Low Bond Precision on          | C-C Bonds | .....                        |     | 0.0058 | Ang  |      |
| PLAT366_ALERT_2_C | Short? C(sp?)-C(sp?) Bond      | C21       | -                            | C22 | ...    | 1.37 | Ang. |
| PLAT366_ALERT_2_C | Short? C(sp?)-C(sp?) Bond      | C21       | -                            | C26 | ...    | 1.39 | Ang. |

---

● **Alert level G**

|                   |                                             |                   |                              |  |       |       |
|-------------------|---------------------------------------------|-------------------|------------------------------|--|-------|-------|
| PLAT072_ALERT_2_G | SHELXL First                                | Parameter in WGHT | Unusually Large.             |  | 0.12  |       |
| PLAT083_ALERT_2_G | SHELXL Second                               | Parameter in WGHT | Unusually Large.             |  | 12.58 |       |
| PLAT242_ALERT_2_G | Check Low                                   | Ueq               | as Compared to Neighbors for |  |       | C17A  |
| PLAT301_ALERT_3_G | Note: Main Residue                          | Disorder          | .....                        |  | 18    | Perc. |
| PLAT811_ALERT_5_G | No ADDSYM Analysis: Too Many Excluded Atoms | ....              |                              |  |       | !     |

- 
- 0 **ALERT level A** = Most likely a serious problem - resolve or explain  
0 **ALERT level B** = A potentially serious problem, consider carefully  
8 **ALERT level C** = Check. Ensure it is not caused by an omission or oversight  
5 **ALERT level G** = General information/check it is not something unexpected
- 0 ALERT type 1 CIF construction/syntax error, inconsistent or missing data  
8 ALERT type 2 Indicator that the structure model may be wrong or deficient  
3 ALERT type 3 Indicator that the structure quality may be low  
1 ALERT type 4 Improvement, methodology, query or suggestion  
1 ALERT type 5 Informative message, check
- 

It is advisable to attempt to resolve as many as possible of the alerts in all categories. Often the minor alerts point to easily fixed oversights, errors and omissions in your CIF or refinement strategy, so attention to these fine details can be worthwhile. In order to resolve some of the more serious problems it may be necessary to carry out additional measurements or structure refinements. However, the purpose of your study may justify the reported deviations and the more serious of these should normally be commented upon in the discussion or experimental section of a paper or in the "special\_details" fields of the CIF. checkCIF was carefully designed to identify outliers and unusual parameters, but every test has its limitations and alerts that are not important in a particular case may appear. Conversely, the absence of alerts does not guarantee there are no aspects of the results needing attention. It is up to the individual to critically assess their own results and, if necessary, seek expert advice.

### Publication of your CIF in IUCr journals

A basic structural check has been run on your CIF. These basic checks will be run on all CIFs submitted for publication in IUCr journals (*Acta Crystallographica*, *Journal of Applied Crystallography*, *Journal of Synchrotron Radiation*); however, if you intend to submit to *Acta Crystallographica Section C* or *E*, you should make sure that full publication checks are run on the final version of your CIF prior to submission.

### Publication of your CIF in other journals

Please refer to the *Notes for Authors* of the relevant journal for any special instructions relating to CIF submission.

---

**PLATON version of 05/11/2012; check.def file version of 05/11/2012**

Datablock 3 - ellipsoid plot

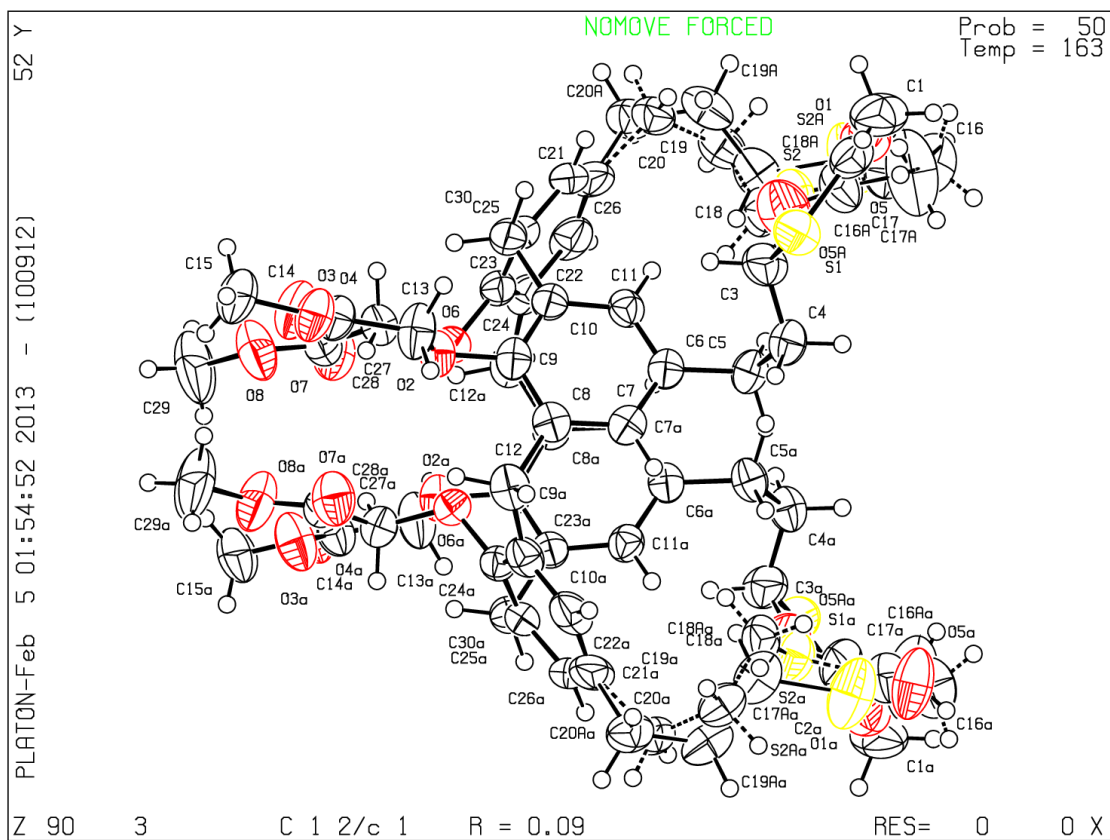

Supplement: c3nj00223c.pdf [file c3nj00223c.pdf]
